# Supplementary material for: Smoking, ACE-2 and COVID-19: ongoing controversies
Source: PubMed Central journal article supplement — Eur Respir J. 2020 Jul 16;56(1):2001759. doi: 10.1183/13993003.01759-2020 (PMC7363948; doi:10.1183/13993003.01759-2020), 2020-07-16
Supplement: ERJ-01759-2020.Shareable.pdf [file ERJ-01759-2020.Shareable.pdf]

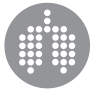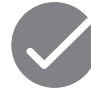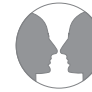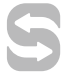

SHAREABLE PDF

# Smoking, ACE-2 and COVID-19: ongoing controversies

Janice M. Leung and Don D. Sin

**Affiliation:** Centre for Heart Lung Innovation and the Division of Respiratory Medicine, St. Paul's Hospital, University of British Columbia, Vancouver, BC, Canada.

**Correspondence:** Don D. Sin, Centre for Heart Lung Innovation, St. Paul's Hospital, University of British Columbia, 1081 Burrard Street, Vancouver, BC, V6Z 1Y6, Canada. E-mail: Don.Sin@hli.ubc.ca

 @ERSpublications  
**Smoking increases severity of COVID-19** <https://bit.ly/2yWp3jb>

**Cite this article as:** Leung JM, Sin DD. Smoking, ACE-2 and COVID-19: ongoing controversies. *Eur Respir J* 2020; 56: 2001759 [<https://doi.org/10.1183/13993003.01759-2020>].

This single-page version can be shared freely online.

## *From the authors:*

The three letters from D. Lutchman, K.D. McAlinden and co-workers, and K. Farsalinos and co-workers together capture the divergence in opinion on the impact of smoking on coronavirus disease 2019 (COVID-19) and whether the angiotensin-converting enzyme 2 (ACE-2) receptor mediates this relationship. At the heart of this controversy is whether smoking reduces or increases the risk of contracting COVID-19. K. Farsalinos and co-workers, through analysis of the pooled prevalence of current smoking across 11 case series determined that current smoking status was significantly lower than expected gender- and age-adjusted prevalence in COVID-19 patients. That smoking could potentially be protective against COVID-19 has not gone unnoticed by the public. Since late April, multiple media outlets have reported on this possibility, prompting the World Health Organization (WHO) to release a warning on 4 May, 2020, on tobacco use during this pandemic [1]. While we do not dispute that the prevalence of smoking in COVID-19 cases has been surprisingly low across the world, we would echo WHO's advice, based on emerging evidence that outcomes in COVID-19 are worse in patients who do smoke. An analysis conducted by KILLERBY *et al.* [2], of 220 hospitalised and 311 nonhospitalised patients with COVID-19 patients across six acute care hospitals and associated outpatient clinics in metropolitan Atlanta, Georgia, for instance, demonstrated that smoking was an independent risk factor for COVID-19 hospitalisation, carrying an odds ratio of 2.3 (95% CI 1.2–4.5). A recent meta-analysis has also shown that smokers have a relative risk of 1.34 (95% CI 1.07–1.67) of having more severe disease or experiencing refractory or progressive disease [3]. While smoking may not necessarily increase one's risk for contracting COVID-19, the biological and inflammatory cascade that occurs upon severe acute respiratory syndrome coronavirus 2 (SARS-CoV-2) infection may be particularly devastating for a smoker.
